# Supplementary material for: Analysis of the Effects of Food Additives on Porphyromonas gingivalis
Source: MDPI journal article supplement (doi:10.3390/pathogens11010065), 2022-01-04
Supplement: s1 [file s1]

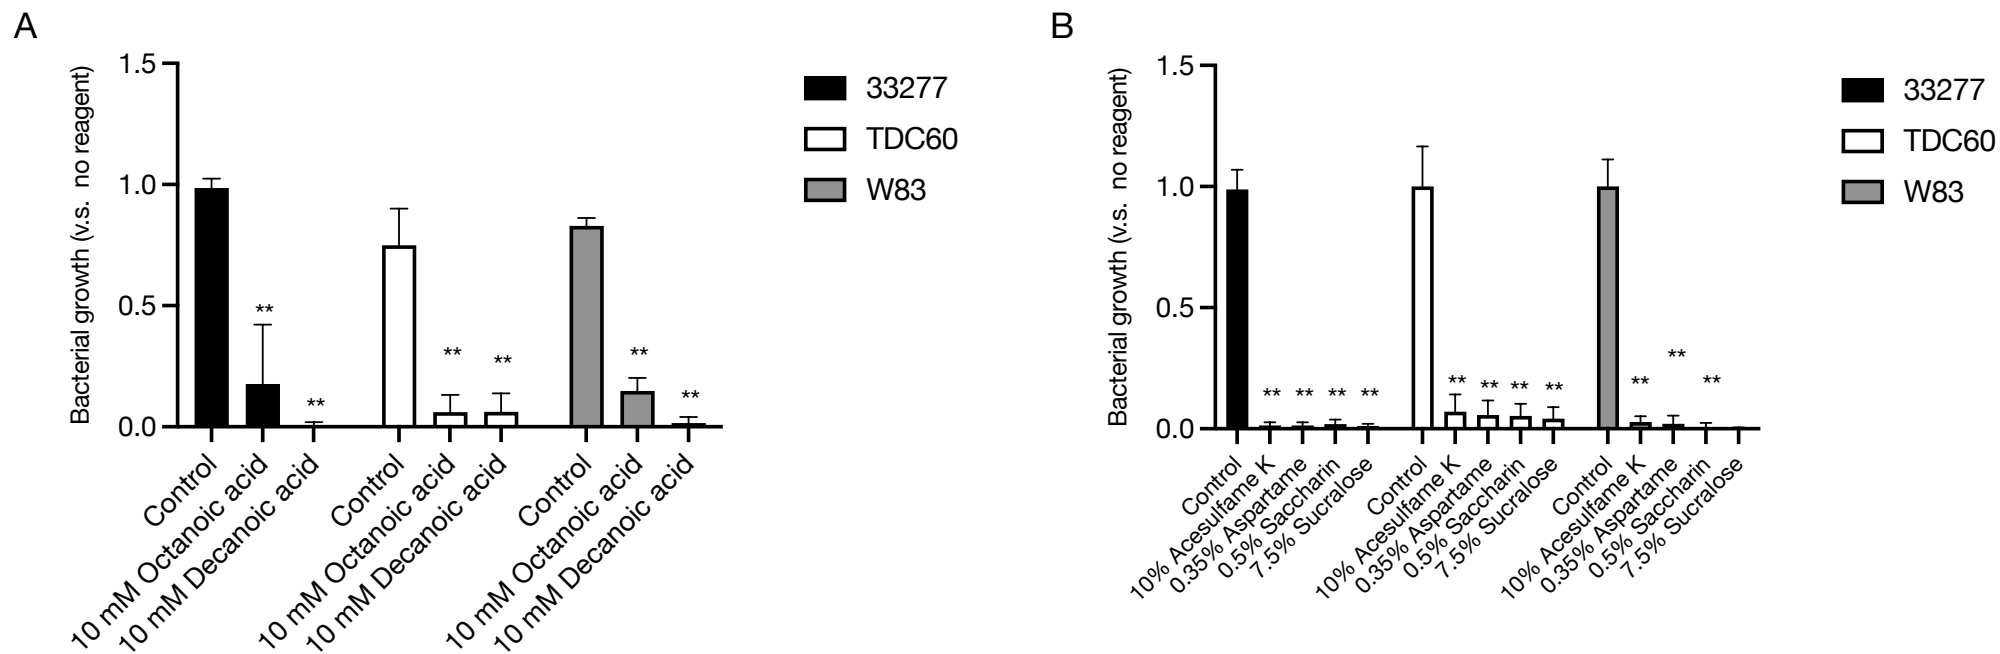

**Figure S1.** Growth inhibition effect of Medium-chain fatty acids (A) and artificial sweeteners (B) on *P. gingivalis* TDC60 and W83. \*\* indicates that each is significant at  $p < 0.01$ .
